# Supplementary material for: Effects of intercropping teak with Alpinia katsumadai Hayata and Amomum longiligulare T.L. Wu on rhizosphere soil nutrients and bacterial community diversity, structure, and network
Source: Frontiers journal article supplement (doi:10.3389/fmicb.2024.1328772), 2024-02-19
Supplement: Data_Sheet_1.PDF [file Data_Sheet_1.PDF]

Table S1 Statistics of Fastq data splicing results

| SampleID | raw_tags | clean_tags |
|----------|----------|------------|
| C1       | 131526   | 120849     |
| C2       | 132445   | 124993     |
| C3       | 119292   | 111242     |
| C4       | 49911    | 48032      |
| ck1      | 76239    | 72786      |
| ck2      | 31438    | 30415      |
| ck3      | 85899    | 82590      |
| ck4      | 32069    | 31213      |
| S1       | 42920    | 41405      |
| S2       | 37803    | 36245      |
| S3       | 64477    | 61238      |
| S4       | 60816    | 58153      |

Note: raw\_tags is the result obtained after quality control splicing of Fastq data, and clean\_tags is the result obtained after further removal of chimeric and short sequences from the splicing results.

Table S2 Quality sequence length distribution statistics

| distribute | reads  |
|------------|--------|
| 0-200      | 0      |
| 200-260    | 0      |
| 260-320    | 375    |
| 320-360    | 623    |
| 360-380    | 348    |
| 380-400    | 1330   |
| 400-420    | 307185 |
| 420-440    | 507300 |
| 440-460    | 1922   |
| 460-480    | 71     |
| 480-500    | 7      |
| 500-520    | 0      |
| 520-540    | 0      |
| 540-560    | 0      |
| 560-600    | 0      |

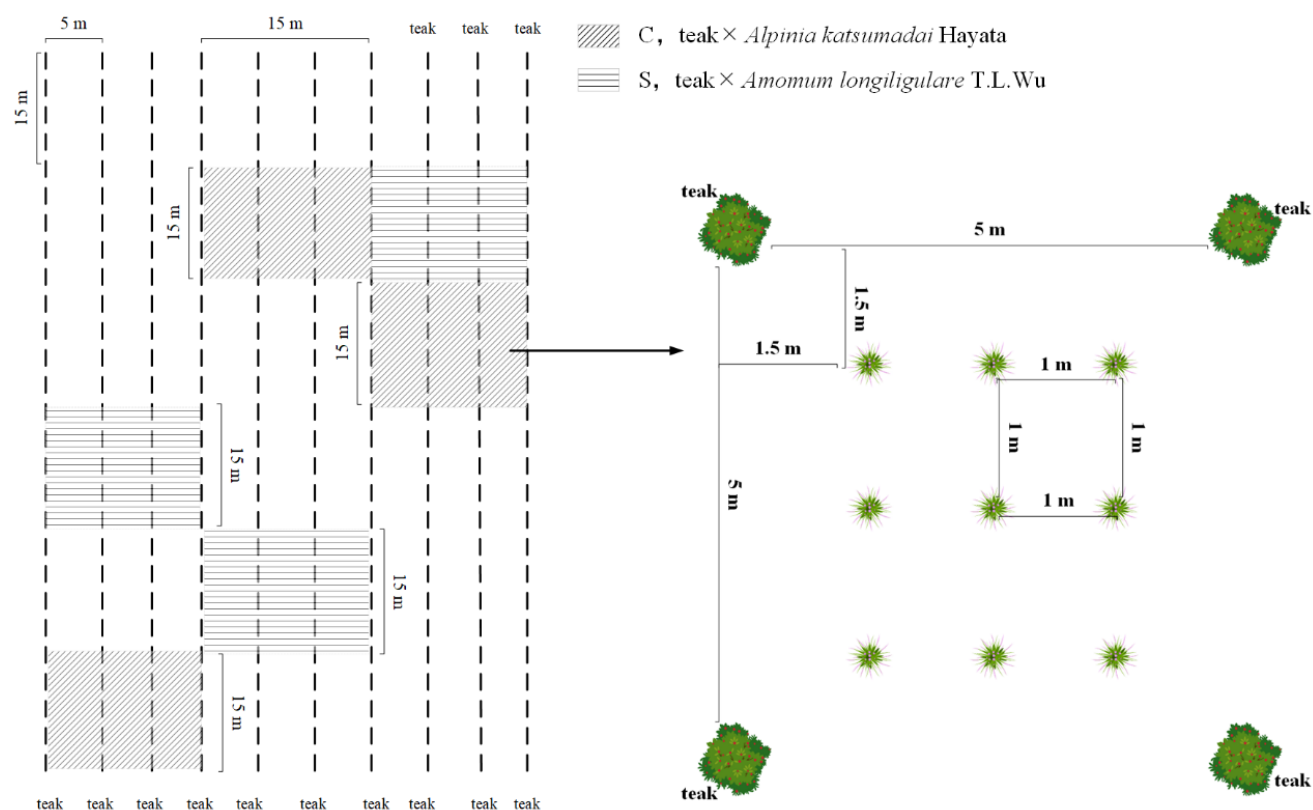

Figure S1 Interplanting test layout and sampling method diagram.

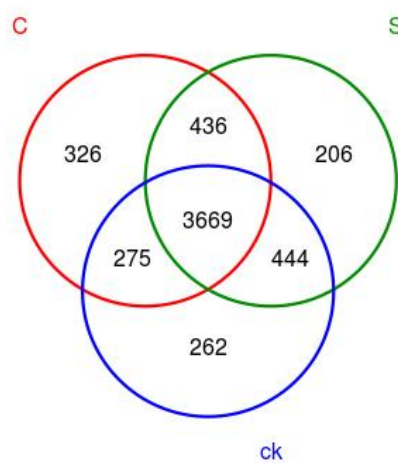

Figure S2 The number of shared and unique OTUs in soil rhizosphere samples

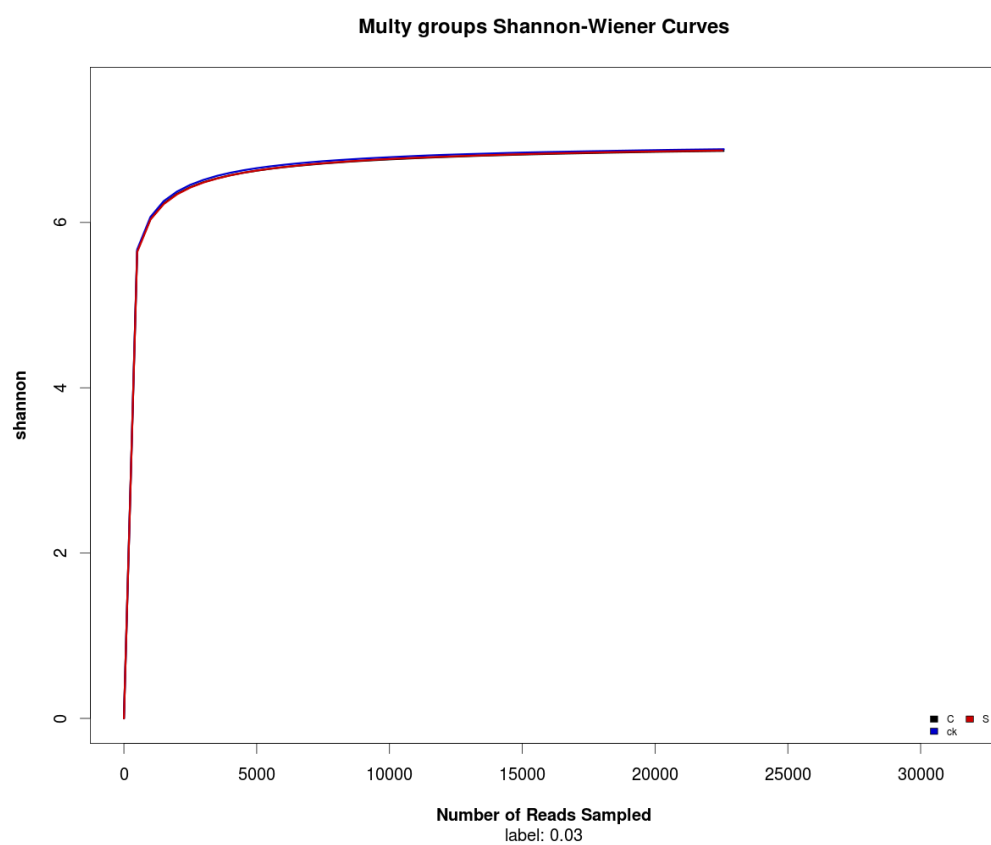

Figure S3 Rhizosphere soil samples of C, S and ck Shannon Wiener curve

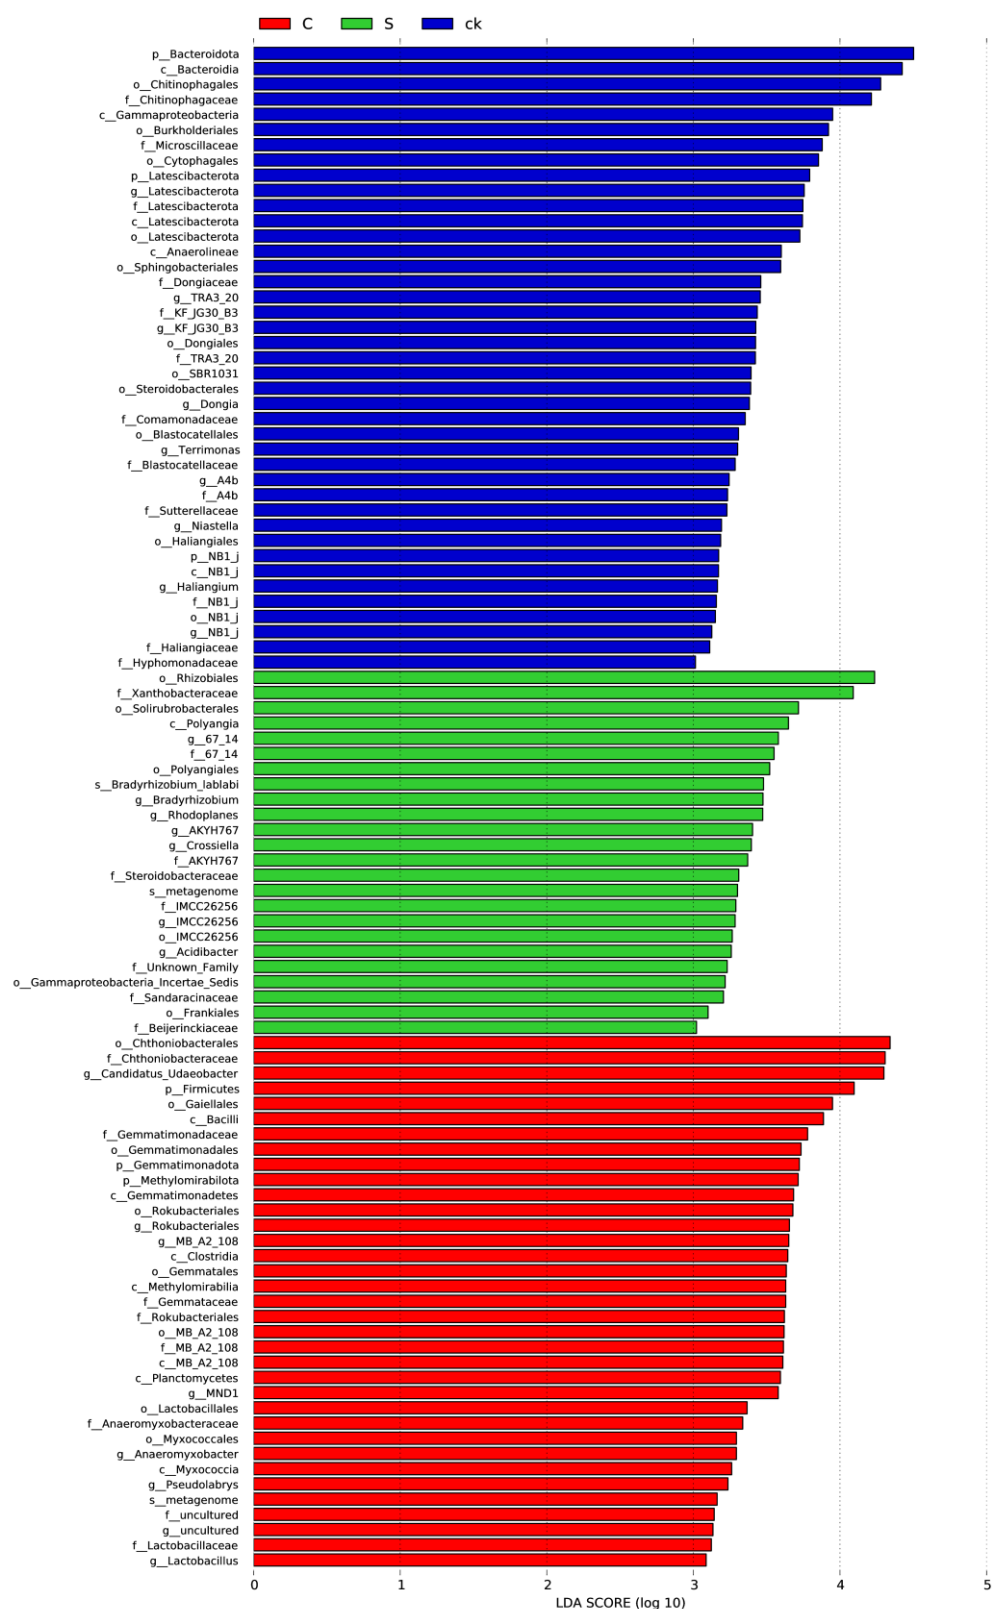

Figure S4 Linear discriminant Analysis (LDA) effect size (LEfSe) of bacterial biomarkers in rhizosphere soil samples. When the LDA score was greater than 2, the difference was statistically significant ( $p < 0.05$ ).
